# Supplementary material for: Microbiota and Pathogen Proteases Modulate Type III Secretion Activity in Enterohemorrhagic Escherichia coli
Source: PubMed Central journal article supplement (PMC6282197; doi:10.1128/mbio.02204-18), 2018-12-04
Supplement: mbo006184200sf1.pdf [file mbo006184200sf1.pdf]

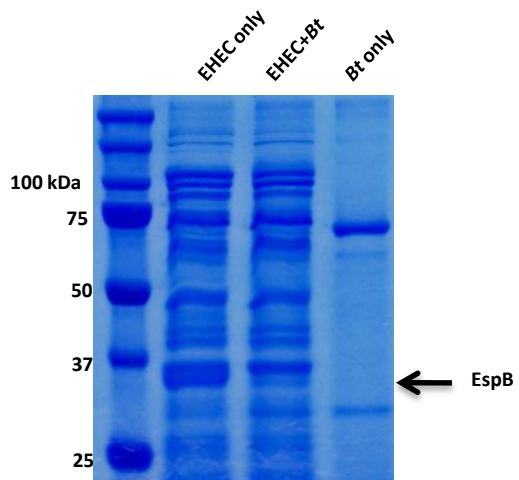

**Fig.S1.** Coomassie blue stain of supernatants from EHEC grown in the presence or absence of *Bt* for 6 hr. EspB is no longer present when EHEC is grown in the presence of *Bt*.
