# Supplementary material for: Microbiota and Pathogen Proteases Modulate Type III Secretion Activity in Enterohemorrhagic Escherichia coli
Source: PubMed Central journal article supplement (PMC6282197; doi:10.1128/mbio.02204-18), 2018-12-04
Supplement: mbo006184200sf2.pdf [file mbo006184200sf2.pdf]

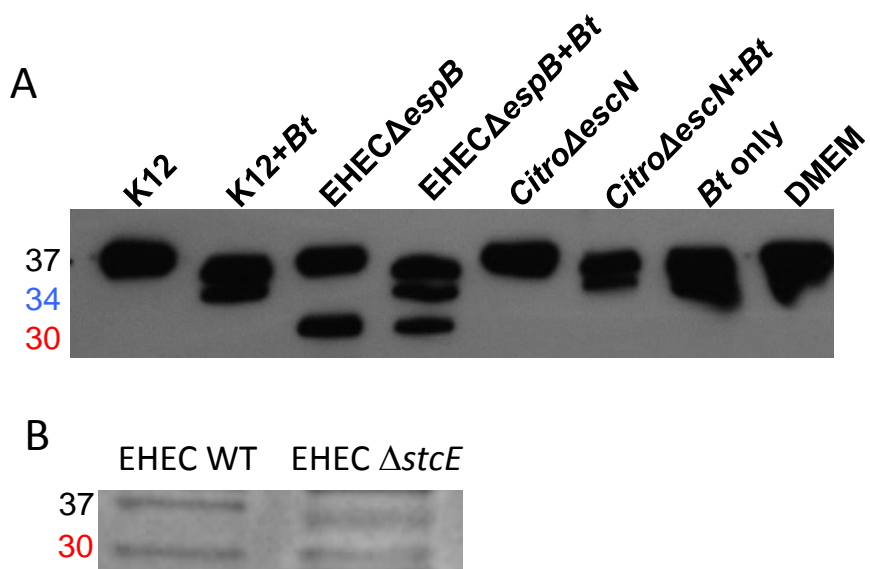

**Fig.S2.** EspP is the EHEC protease that cleaves EspB. (A) rEspB was incubated from supernatants from *E. coli* K12,  $\Delta$ espB EHEC or a T3SS-deficient ( $\Delta$ escN) *Citrobacter rodentium* strain +/- *B. theta*. (B) Western blot of endogenous EspB in WT and  $\Delta$ stcE supernatants.
