# Supplementary material for: Microbiota and Pathogen Proteases Modulate Type III Secretion Activity in Enterohemorrhagic Escherichia coli
Source: PubMed Central journal article supplement (PMC6282197; doi:10.1128/mbio.02204-18), 2018-12-04
Supplement: mbo006184200sf3.pdf [file mbo006184200sf3.pdf]

| Strain             | $\Delta espB$ |               | $\Delta espB \Delta espP$ |               | $\Delta espB$ |               | $\Delta espB \Delta espP$ |               | -- |
|--------------------|---------------|---------------|---------------------------|---------------|---------------|---------------|---------------------------|---------------|----|
|                    | $\Delta espB$ | $\Delta espB$ | $\Delta espP$             | $\Delta espP$ | $\Delta espB$ | $\Delta espB$ | $\Delta espP$             | $\Delta espP$ |    |
| HiTrap Benzamidine | -             | -             | -                         | -             | +             | +             | +                         | +             | -- |
| EspB-His (50 ug)   | -             | +             | -                         | +             | -             | +             | -                         | +             | +  |

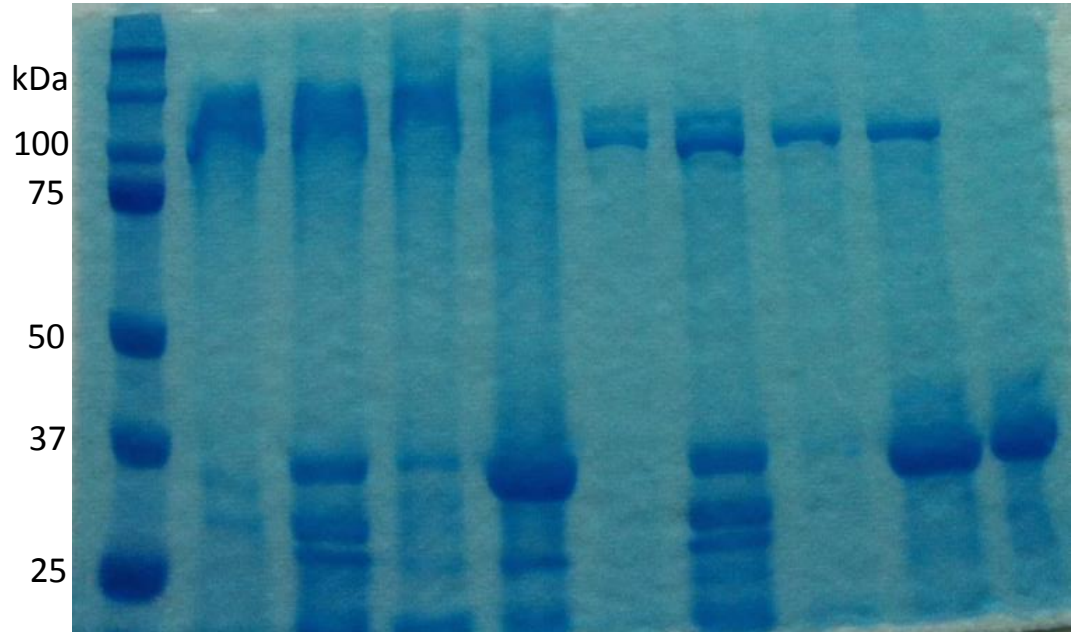

**Fig. S3. Coomassie stain of HiTrap Benzamidine trapping of EspP used for espB degradation.**

Grown  $\Delta espB$  or  $\Delta espB \Delta espP$  in 200 ml low-glucose DMEM, 37°C, 5% CO<sub>2</sub> for 4.5 hrs; filtered and concentrated with 10 kDa cut-off to 1 ml; buffer-exchanged 500 ul with PBS; buffer-exchanged other 500 ul with Binding Buffer and ran over HiTrap Benzamidine column; eluted with 7.5 ml glycine buffer, pH 3.0 into 2 ml Tris buffer, pH 9.0 → buffer-exchanged with PBS to volume of 200 ul. Incubated samples +/- 50 ug of EspB overnight, 37°C; ran on 12% SDS-PAGE and Coomassie stained
