# Supplementary material for: Microbiota and Pathogen Proteases Modulate Type III Secretion Activity in Enterohemorrhagic Escherichia coli
Source: PubMed Central journal article supplement (PMC6282197; doi:10.1128/mbio.02204-18), 2018-12-04
Supplement: mbo006184200sf4.pdf [file mbo006184200sf4.pdf]

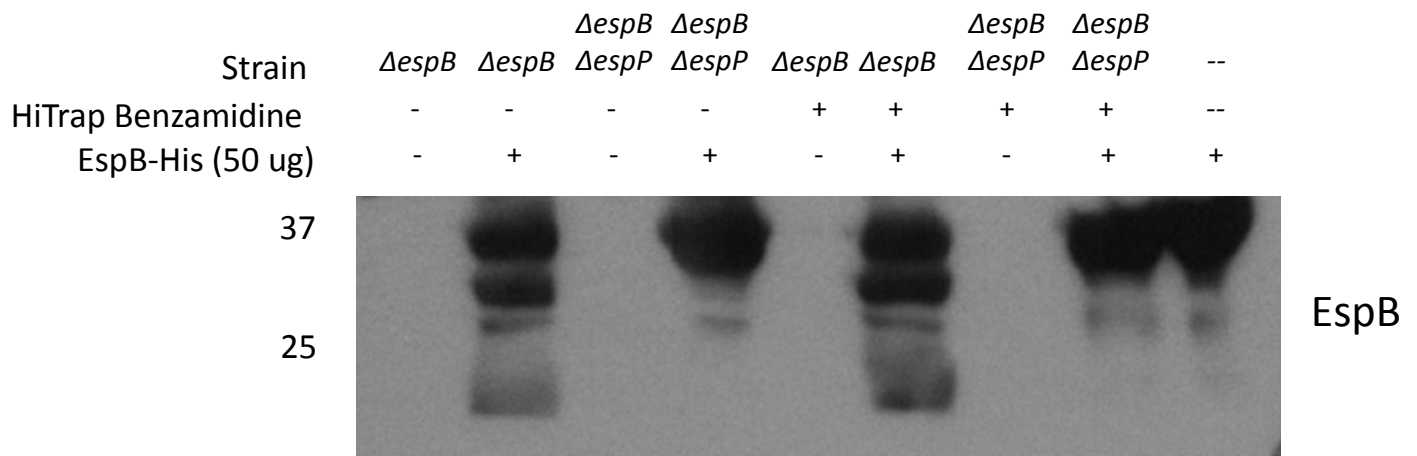

**Fig. S4. Western Blot of HiTrap Benzamidine trapping of EspP used for *espB* degradation.**

Grown *ΔespB* or *ΔespBΔespP* in 200 ml low-glucose DMEM, 37°C, 5% CO<sub>2</sub> for 4.5 hrs; filtered and concentrated with 10 kDa cut-off to 1 ml; buffer-exchanged 500 ul with PBS; buffer-exchanged other 500 ul with Binding Buffer and ran over HiTrap Benzamidine column; eluted with 7.5 ml glycine buffer, pH 3.0 into 2 ml Tris buffer, pH 9.0 → buffer-exchanged with PBS to volume of 200 ul. Incubated samples +/- 50 ug of EspB overnight, 37°C; ran on 12% SDS-PAGE and performed Western blots using anti-EspB antiserum.
