# Supplementary material for: Microbiota and Pathogen Proteases Modulate Type III Secretion Activity in Enterohemorrhagic Escherichia coli
Source: PubMed Central journal article supplement (PMC6282197; doi:10.1128/mbio.02204-18), 2018-12-04
Supplement: mbo006184200sf5.pdf [file mbo006184200sf5.pdf]

| Bt proteins identified in Bt EHEC co-culture supernatant |                                |                           |
|----------------------------------------------------------|--------------------------------|---------------------------|
| Locus Tag                                                | Description                    | Predicted Domains         |
| BT_2479                                                  | Iron-regulated protein A       | Peptidase M75             |
| BT_2064                                                  | Uncharacterized protein        | None                      |
| BT_0241                                                  | Uncharacterized protein        | None                      |
| BT_4263                                                  | GAPDH                          |                           |
| BT_3742                                                  | Uncharacterized protein        | None                      |
| BT_2753                                                  | Putative transmembrane protein | OmpA-like $\beta$ -barrel |

**Fig.S5. *Bt* proteins identified in *Bt* + EHEC co-culture by Mass spectrometry**
