# Supplementary material for: Microbiota and Pathogen Proteases Modulate Type III Secretion Activity in Enterohemorrhagic Escherichia coli
Source: PubMed Central journal article supplement (PMC6282197; doi:10.1128/mbio.02204-18), 2018-12-04
Supplement: mbo006184200st1.pdf [file mbo006184200st1.pdf]

**Table S1. Secreted Proteins: EHEC+B. theta/EHEC alone**

| <b>Both</b>                                   | <b>Ratio EHEC+B theta/EHEC only</b> |
|-----------------------------------------------|-------------------------------------|
| ATP Synthase Gamma                            | 55.75                               |
| H-protein                                     | 51.59                               |
| StcE                                          | 19.88                               |
| Lipoamide dehydrogenase                       | 17.57                               |
| 6-phosphogluconolactonase                     | 14.02                               |
| Outer membrane protein Tsx                    | 12.93                               |
| Tryptophan tRNA synthetase                    | 10.85                               |
| Aspartate ammonia-lyase (aspA)                | 7.53                                |
| terB (stress response)                        | 7.3                                 |
| Enolase                                       | 5.48                                |
| Beta-ketoacyl-acyl carrier protein            | 5.18                                |
| Leucine-specific binding protein              | 5.08                                |
| ClpP, serine protease                         | 4.41                                |
| Glucose-specific PTS system IIA component     | 4.28                                |
| Stx2b subunit                                 | 4.16                                |
| Ferric enterobactin binding protein           | 3.9                                 |
| Fructose-1,6-bisphosphate aldolase            | 3.82                                |
| 2-amino-3-ketobutyrate coA ligase             | 3.51                                |
| Superoxide dismutase (SodB)                   | 2.92                                |
| Serine hydroxymethyltransferase               | 2.71                                |
| Phosphoglycerate kinase                       | 2.52                                |
| EspA                                          | 2.32                                |
| TerD (stress)                                 | 2.28                                |
| Triosephosphate isomerase                     | 2.09                                |
| Aspartate aminotransferase                    | 1.93                                |
| TerE                                          | 1.91                                |
| OmpC                                          | 1.84                                |
| EspP                                          | 1.36                                |
| EspD                                          | 0.77                                |
| rpLO, 50S ribosomal subunit                   | 0.56                                |
| single-strand DNA binding protein (ssb)       | 0.54                                |
| lpp, outer membrane lipoprotein               | 0.54                                |
| 30S subunit protein S9                        | 0.39                                |
| Recomb. assoc. protein (putative exonuclease) | 0.26                                |
| Ribosomal protein S12                         | 0.16                                |
| Ribose-5-phosphate isomerase                  | 0.13                                |
| EspB                                          | 0.002                               |
