# Supplementary material for: Microbiota and Pathogen Proteases Modulate Type III Secretion Activity in Enterohemorrhagic Escherichia coli
Source: PubMed Central journal article supplement (PMC6282197; doi:10.1128/mbio.02204-18), 2018-12-04
Supplement: mbo006184200st2.pdf [file mbo006184200st2.pdf]

**Table S2. Strains and plasmids**

| <b><u>Strains</u></b>                           |                                                                                 |                                                                  |
|-------------------------------------------------|---------------------------------------------------------------------------------|------------------------------------------------------------------|
| <i>Strain</i>                                   | <i>Genotype</i>                                                                 | <i>Reference</i>                                                 |
| <b>EHEC</b>                                     |                                                                                 |                                                                  |
| Wild-type (WT)                                  | <i>E. coli</i> O157:H7 86-24 clinical isolate                                   | (1)                                                              |
| $\Delta espB$ (MMC03)                           | isogenic <i>espB</i> deletion mutant                                            | (2)                                                              |
| $\Delta espA$                                   | isogenic <i>espA</i> deletion mutant                                            | This study                                                       |
| $\Delta espD$                                   | isogenic $\Delta espD$ deletion mutant                                          | This study                                                       |
| $\Delta espP$                                   | isogenic $\Delta espP$ deletion mutant                                          | This study                                                       |
| $\Delta espB\Delta espP$                        | isogenic $\Delta espB\Delta espP$ deletion mutant                               | This study                                                       |
| $\Delta espA\Delta espP$                        | isogenic $\Delta espA\Delta espP$ deletion mutant                               | This study                                                       |
| $\Delta espD\Delta espP$                        | isogenic $\Delta espD\Delta espP$ deletion mutant                               | This study                                                       |
| WT <i>pbla</i>                                  | WT 86-24 carrying <i>bla</i> :pBAD33                                            | This study                                                       |
| WT <i>ptir-bla</i>                              | WT 86-24 carrying <i>tir-bla</i> :pBAD33                                        | This study                                                       |
| $\Delta espP$ <i>pbla</i>                       | $\Delta espP$ 86-24 carrying <i>bla</i> :pBAD33                                 | This study                                                       |
| $\Delta espP$ <i>ptir-bla</i>                   | $\Delta espP$ 86-24 carrying <i>tir-bla</i> :pBAD33                             | This study                                                       |
| $\Delta espB:: espB$                            | $\Delta espB$ complemented with <i>espB</i> ::pACYC184                          | This study                                                       |
| $\Delta espB:: espB\Delta Btsite$               | $\Delta espB$ complemented with <i>espBL31A S32A</i> ::pACYC184                 | This study                                                       |
| $\Delta espB:: espB\Delta EspPsite$             | $\Delta espB$ complemented with <i>espBA80G V81A</i> ::pACYC184                 | This study                                                       |
| <b><i>Bacteroides thetaiotaomicron</i> (Bt)</b> |                                                                                 |                                                                  |
| VPI-5482                                        | Wild-type, Gent <sup>R</sup>                                                    | ATCC 29148                                                       |
| <b><i>Citrobacter rodentium</i></b>             |                                                                                 |                                                                  |
| DBS770                                          | Stx+ <i>C. rodentium</i>                                                        | (3)                                                              |
| MMC01                                           | $\Delta escN$ isogenic deletion mutant of DBS770                                | (4)                                                              |
| <b><i>E. coli</i></b>                           |                                                                                 |                                                                  |
| MG1655                                          | K12 <i>E. coli</i> strain                                                       | <i>E. coli</i> Genetic Stock Culture Collection; Yale University |
| <b><u>Plasmids</u></b>                          |                                                                                 |                                                                  |
| <i>Plasmid</i>                                  | <i>Contents</i>                                                                 | <i>Reference</i>                                                 |
| pKD3                                            | $\lambda$ red template plasmid                                                  | (5)                                                              |
| pKD46                                           | $\lambda$ red helper plasmid                                                    | (5)                                                              |
| pCP20                                           | $\lambda$ red helper plasmid                                                    | (5)                                                              |
| pDP151                                          | Constitutive mCherry expression                                                 |                                                                  |
| pACYC184                                        | Cloning vector                                                                  | New England Biolabs                                              |
| pBAD33                                          | Cloning vector with arabinose-inducible promoter                                | (6)                                                              |
| <i>espB</i> ::pET21                             | <i>espB</i> from 86-24 in pET21a protein expression vector                      | This study                                                       |
| <i>espA</i> ::pET28                             | <i>espA</i> from 86-24 in pET28a protein expression vector                      | This study                                                       |
| <i>espD</i> ::pET21                             | <i>espD</i> from 86-24 in pET21a protein expression vector                      | This study                                                       |
| <i>bla</i> :pBAD33                              | $\beta$ -lactamase under control of pBAD promoter in pBAD33                     | This study                                                       |
| <i>tir-bla</i> :pBAD33                          | <i>tir</i> - $\beta$ -lactamase fusion under control of pBAD promoter in pBAD33 | This study                                                       |
| <i>espB</i> ::pACYC184                          | WT <i>espB</i> under the tet promoter in pACYC184                               | This study                                                       |
| <i>espB</i> $\Delta Btsite$ ::pACYC184          | <i>espB L31A S32A</i> under the tet promoter in pACYC184                        | This study                                                       |
| <i>espB</i> $\Delta EspPsite$ ::pACYC184        | <i>espB A80G V81A</i> under the tet promoter in pACYC184                        | This study                                                       |

### Supplement References

1. **Griffin PM, Ostroff SM, Tauxe RV, Greene KD, Wells JG, Lewis JH, Blake PA.** 1988. Illnesses associated with Escherichia coli O157:H7 infections. A broad clinical spectrum. *Ann Intern Med* **109**:705-712.
2. **Carlson-Banning KM, Sperandio V.** 2016. Catabolite and Oxygen Regulation of Enterohemorrhagic Escherichia coli Virulence. *MBio* **7**.
3. **Mallick EM, McBee ME, Vanguri VK, Melton-Celsa AR, Schlieper K, Karalius BJ, O'Brien AD, Butterton JR, Leong JM, Schauer DB.** 2012. A novel murine infection model for Shiga toxin-producing Escherichia coli. *J Clin Invest* **122**:4012-4024.
4. **Curtis MM, Hu Z, Klimko C, Narayanan S, Deberardinis R, Sperandio V.** 2014. The gut commensal Bacteroides thetaiotaomicron exacerbates enteric infection through modification of the metabolic landscape. *Cell Host Microbe* **16**:759-769.
5. **Datsenko KA, Wanner BL.** 2000. One-step inactivation of chromosomal genes in Escherichia coli K-12 using PCR products. *Proc Natl Acad Sci U S A* **97**:6640-6645.
6. **Guzman LM, Belin D, Carson MJ, Beckwith J.** 1995. Tight regulation, modulation, and high-level expression by vectors containing the arabinose PBAD promoter. *J Bacteriol* **177**:4121-4130.
