# Supplementary material for: Microbiota and Pathogen Proteases Modulate Type III Secretion Activity in Enterohemorrhagic Escherichia coli
Source: PubMed Central journal article supplement (PMC6282197; doi:10.1128/mbio.02204-18), 2018-12-04
Supplement: mbo006184200st3.pdf [file mbo006184200st3.pdf]

**Table S3. primers**

| primer                            | Sequence 5'→3'                                                                                | Description                                            |
|-----------------------------------|-----------------------------------------------------------------------------------------------|--------------------------------------------------------|
| <i>qPCR</i>                       |                                                                                               |                                                        |
| <i>rpoA</i> F                     | GCGCTCATCTTCTTCCGAAT                                                                          | housekeeping                                           |
| <i>rpoA</i> R                     | CGCGGTCGTGGTTAGTG                                                                             | housekeeping                                           |
| <i>espA</i> F                     | TCAGAATCGCAGCCTGAAAA                                                                          |                                                        |
| <i>espA</i> R                     | CGAAGGATGAGGTGGTTAAGCT                                                                        |                                                        |
| <i>espB</i> F                     | TCAGATTCAGCAGGCCGTTT                                                                          |                                                        |
| <i>espB</i> R                     | GTCACGGCAACAAATGCTGT                                                                          |                                                        |
| <i>espD</i> F                     | TGTTGGCCAGGTCTTTGGTT                                                                          |                                                        |
| <i>espD</i> R                     | TAACAGTGAAGACACCCCGC                                                                          |                                                        |
| <i>Lambda Red mutagenesis</i>     |                                                                                               |                                                        |
| <i>espB</i> lambda red F          | AGCACGGGTAAATAGTCGTATTGTTAGTGGCCGAATTTAATTATTAAGAGAAT<br><u>TTTATTGTGTAGGCTGGAGCTGCTTCG</u>   | EHEC $\Delta espB$ deletion                            |
| <i>espB</i> lambda red R          | CCCTTTTTGTTCAAGATAGTAATTAACACTTCATCATTAAACGTATCGACCATG<br><u>ATCAACATATGAATATCCTCCTTAG</u>    | EHEC $\Delta espB$ deletion                            |
| <i>espD</i> lambda red F          | CAATCTCTACAATATAGAACTATTTTCAGCAATATCCCTTGGTAAATAACCGGAG<br><u>ATAACTGTGTAGGCTGGAGCTGCTTCG</u> | EHEC $\Delta espD$ deletion                            |
| <i>espD</i> lambda red R          | AATTAACCATCGTTACTTGAGTATTATCAATAGTATTCATAATAAAATTCTCTTT<br><u>AATAACATATGAATATCCTCCTTAG</u>   | EHEC $\Delta espD$ deletion                            |
| <i>espP</i> lambda red F          | GTTTCTGAATTATCCGGCAGAGTATCATCAAGAGCAACTGGTAAGAAAAAACAC<br><u>AAACGGTGTAGGCTGGAGCTGCTTCG</u>   | EHEC $\Delta espP$ deletion                            |
| <i>espP</i> lambda red R          | CAAAGGCGGATTTCTCAAACCTCCAGTCCAAAGCGGACGTTATCCCTGATTTCTG<br><u>CATTCATATGAATATCCTCCTTAG</u>    | EHEC $\Delta espP$ deletion                            |
| <i>Plasmid construction</i>       |                                                                                               |                                                        |
| <i>espB</i> ::pET21 F             | GGGGGGGGATCCATGAATACTATTGATAATACT                                                             | Recombinant EspB expression                            |
| <i>espB</i> ::pET21 R             | CTCGAGCCCAGCTAAGCGAC                                                                          | Recombinant EspB expression                            |
| <i>espD</i> ::pET21 F             | GGGGGGGGATCCATGCTTAACGTAAATAACGA                                                              | Recombinant EspD expression                            |
| <i>espD</i> ::pET21 R             | GCGGCCGCTAATTCGGCCACTAACAATA                                                                  | Recombinant EspD expression                            |
| <i>bla</i> ::pBAD gibson insert F | GGGCTAGGAAAAAGGAAGAGTATGAGTATTC                                                               | <i>bla</i> ::pBAD 33 construct for translocation assay |
| <i>bla</i> ::pBAD gibson          | CCAAGCTTGCTTACCAATGCTTAATCAGTGAGG                                                             | <i>bla</i> ::pBAD 33 construct                         |

|                                         |                                             |                                                            |
|-----------------------------------------|---------------------------------------------|------------------------------------------------------------|
| insert R                                |                                             | for translocation assay                                    |
| <i>bla</i> ::pBAD gibson vector F       | GCATTGGTAAGCAAGCTTGGCTGTTTTGG               | <i>bla</i> ::pBAD 33 construct for translocation assay     |
| <i>bla</i> ::pBAD gibson vector R       | CTCTCCTTTTTCTAGCCCCAAAAAACGGG               | <i>bla</i> ::pBAD 33 construct for translocation assay     |
| <i>tir-bla</i> ::pBAD gibson insert F   | GGGCTAGAAAAGGAGATATTTATGCCTATTGGTAATCTTGGTC | <i>tir-bla</i> ::pBAD 33 construct for translocation assay |
| <i>tir-bla</i> ::pBAD gibson insert R   | GCCAAGCTTGCTTACCAATGCTTAATCAGTG             | <i>tir-bla</i> ::pBAD 33 construct for translocation assay |
| <i>tir-bla</i> ::pBAD gibson vector F   | GCATTGGTAAGCAAGCTTGGCTGTTTTGG               | <i>tir-bla</i> ::pBAD 33 construct for translocation assay |
| <i>tir-bla</i> ::pBAD gibson vector R   | CAATAGGCATAAATATCTCCTTTTCTAGCCCCAAAAAACGGG  | <i>tir-bla</i> ::pBAD 33 construct for translocation assay |
| <i>espB</i> ::pAC YC184 gibson insert F | CCGTGTATGAATACTATTGATAATAC                  | <i>espB</i> ::pAC YC184 construct                          |
| <i>espB</i> ::pAC YC184 gibson insert R | GCTTCCATTTACCCAGCTAAGCG                     | <i>espB</i> ::pAC YC184 construct                          |
| <i>espB</i> ::pAC YC184 gibson vector F | GCTGGGTAAATGGAAGCCGG                        | <i>espB</i> ::pAC YC184 construct                          |
| <i>espB</i> ::pAC YC184 gibson vector R | CAATAGTATTCATACACGGTGCCTG                   | <i>espB</i> ::pAC YC184 construct                          |

|                            |                                |                                                      |
|----------------------------|--------------------------------|------------------------------------------------------|
| <i>espB</i> L31A<br>S32A F | GCCGCATCTGCTGCAGCAATTGATTCATC  | <i>espB</i> $\Delta$ Bt<br>site<br>mutagenesi<br>s   |
| <i>espB</i> L31A<br>S32A R | AACTGCACTGGAAGCGCCGG           | <i>espB</i> $\Delta$ Bt<br>site<br>mutagenesi<br>s   |
| <i>espB</i> A80G<br>V81A F | CAGATTCAGCAGGGCGCTTTTGAGAGCCAG | <i>espB</i> $\Delta$ EspP<br>site<br>mutagenesi<br>s |
| <i>espB</i> A80G<br>V81A F | ATAGCTTTGCGCCAATTGTTTTTG       | <i>espB</i> $\Delta$ EspP<br>site<br>mutagenesi<br>s |
